# Supplementary material
Source: PubMed Central journal article supplement (PMC3852161)
Supplement: NIHMS509629-supplement-supplement_1.pdf [file NIHMS509629-supplement-supplement_1.pdf]

**SUPPLEMENTAL TABLE.** International Classification of Diseases, 9th Edition Diagnosis Codes Used to Identify Scleritis and Episcleritis Cases Among Kaiser Permanente Hawaii Members

| ICD-9 Diagnosis Code | Description                                               |
|----------------------|-----------------------------------------------------------|
| 379.09               | Other scleritis                                           |
| 379.07               | Posterior scleritis                                       |
| 379.06               | Brawny scleritis                                          |
| 379.05               | Scleritis with corneal involvement                        |
| 379.04               | Scleromalacia perforans                                   |
| 379.03               | Anterior scleritis                                        |
| 379.02               | Nodular episcleritis                                      |
| 379.01               | Episcleritis periodica fugax                              |
| 379.00               | Scleritis, unspecified                                    |
| 379.0                | Scleritis and episcleritis                                |
| 377.63               | Disorders of visual pathways associated with inflammation |
| 376.1                | Chronic inflammatory disorder, orbit                      |
| 376                  | Acute inflammation of the orbit, unspecified              |
| 364.3                | Anterior uveitis (iridocyclitis)                          |
| 364.24               | Vogt-Koyanagi-Harada (VKH) syndrome                       |
| 364.23               | Lens-induced iridocyclitis                                |
| 364.22               | Glaucomatocyclitic crisis (Posner-Schlossman)             |
| 364.21               | Fuchs heterochromic iridocyclitis                         |
| 364.2                | Posterior uveitis                                         |
| 364.11               | Sarcoid uveitis                                           |
| 364.1                | Chronic iridocyclitis (granulomatous uveitis)             |
| 364.04               | Secondary iridocyclitis, noninfectious                    |
| 364.03               | Secondary iridocyclitis, infectious                       |
| 364.02               | Recurrent iridocyclitis                                   |
| 364.01               | Primary uveitis                                           |
| 364                  | Acute iritis                                              |
| 363.22               | Harada disease                                            |
| 363.21               | Pars planitis                                             |
| 363.2                | Other forms of chorioretinitis and retinochoroiditis      |
| 363.15               | White dot chorioretinopathy                               |
| 363.10-363.13        | Disseminated chorioretinitis                              |
| 363.08               | Peripheral retinitis                                      |
| 363.07               | Posterior pole retinitis                                  |
| 363.06               | Macular retinitis                                         |
| 363.05               | Juxtapapillary retinitis (Jensen)                         |
| 363.00-363.04        | Focal chorioretinitis                                     |
| 362.18               | Vasculitis (including Eales)                              |
| 360.12               | Panuveitis                                                |
| 360.11               | Sympathetic ophthalmia                                    |
| 115.92               | Histoplasmosis retinitis                                  |
| 98.41                | Gonococcal iridocyclitis                                  |
| 91.5                 | Uveitis attributable to secondary syphilis                |
| 53.40-54.49          | Herpes simplex with ophthalmic complications              |
| 53.20-53.29          | Herpes zoster with ophthalmic complications               |

ICD-9 = International Classification of Diseases, 9th Edition.
